# Supplementary material for: Developing diagnostic SNP panels for the identification of true fruit flies (Diptera: Tephritidae) within the limits of COI-based species delimitation
Source: PubMed Central journal article supplement (PMC3682933; doi:10.1186/1471-2148-13-106), 2013-05-29

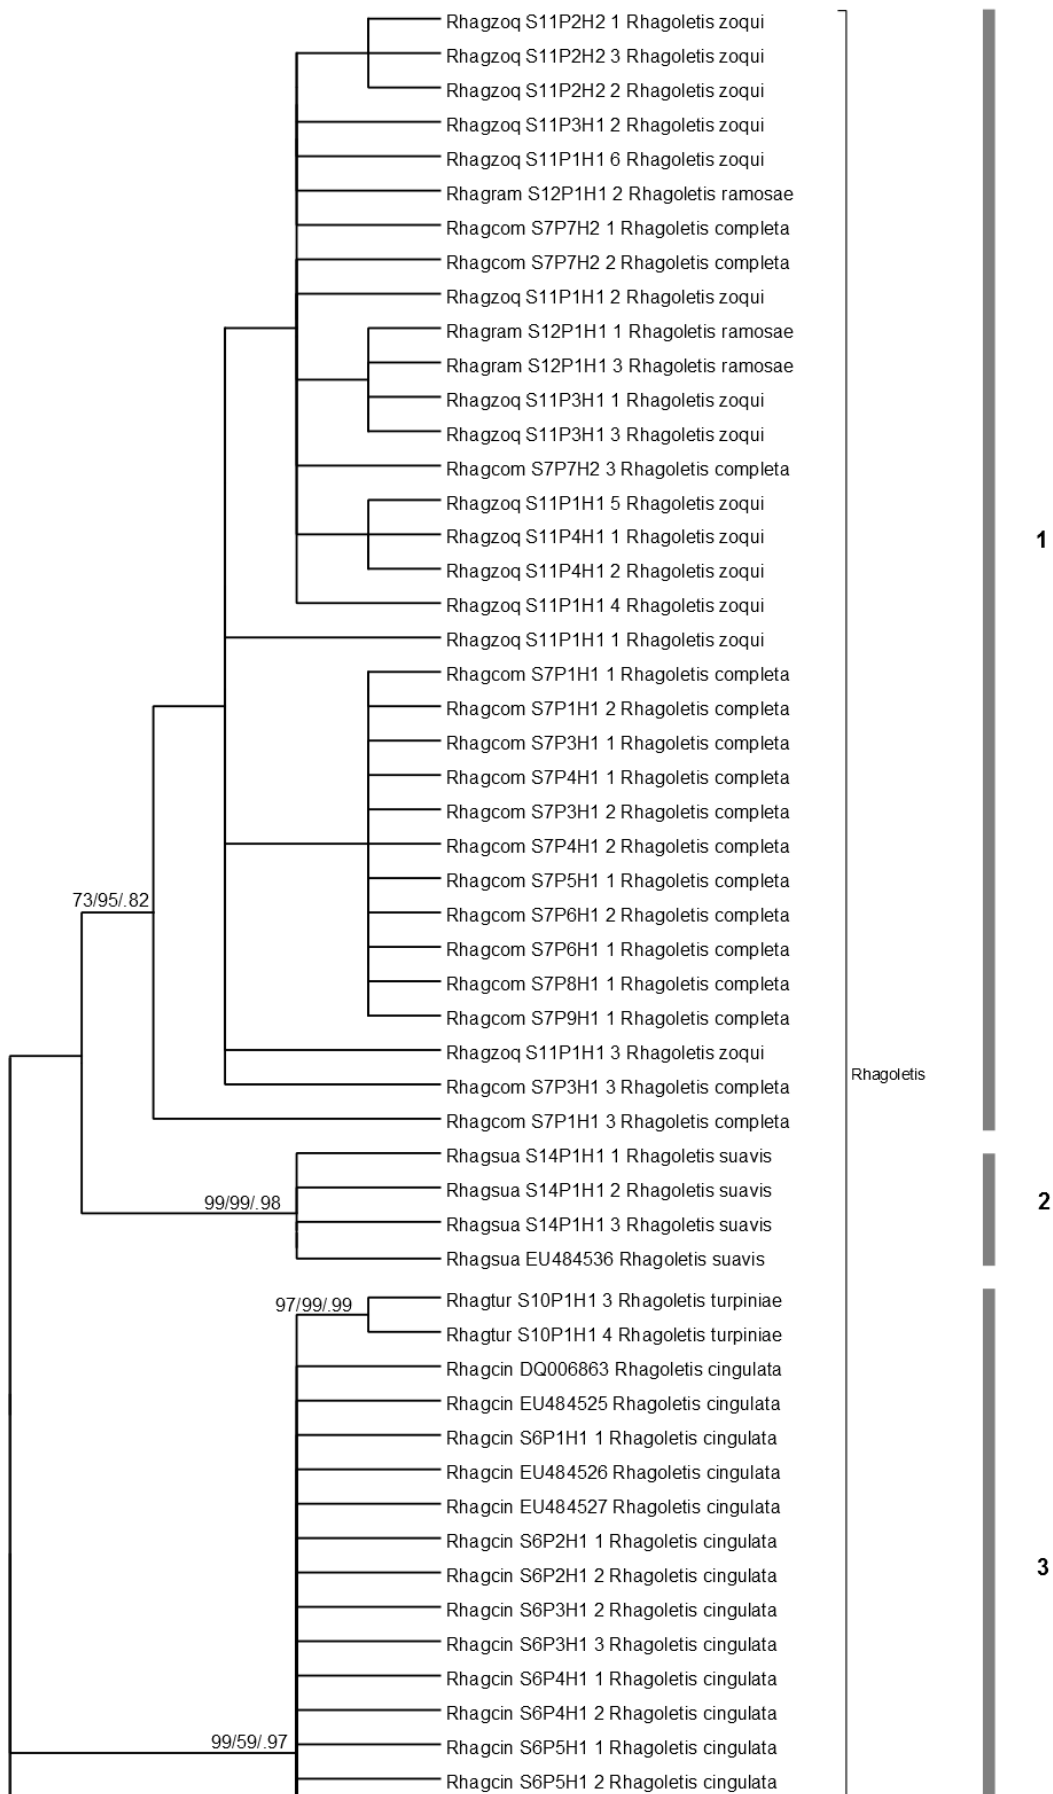

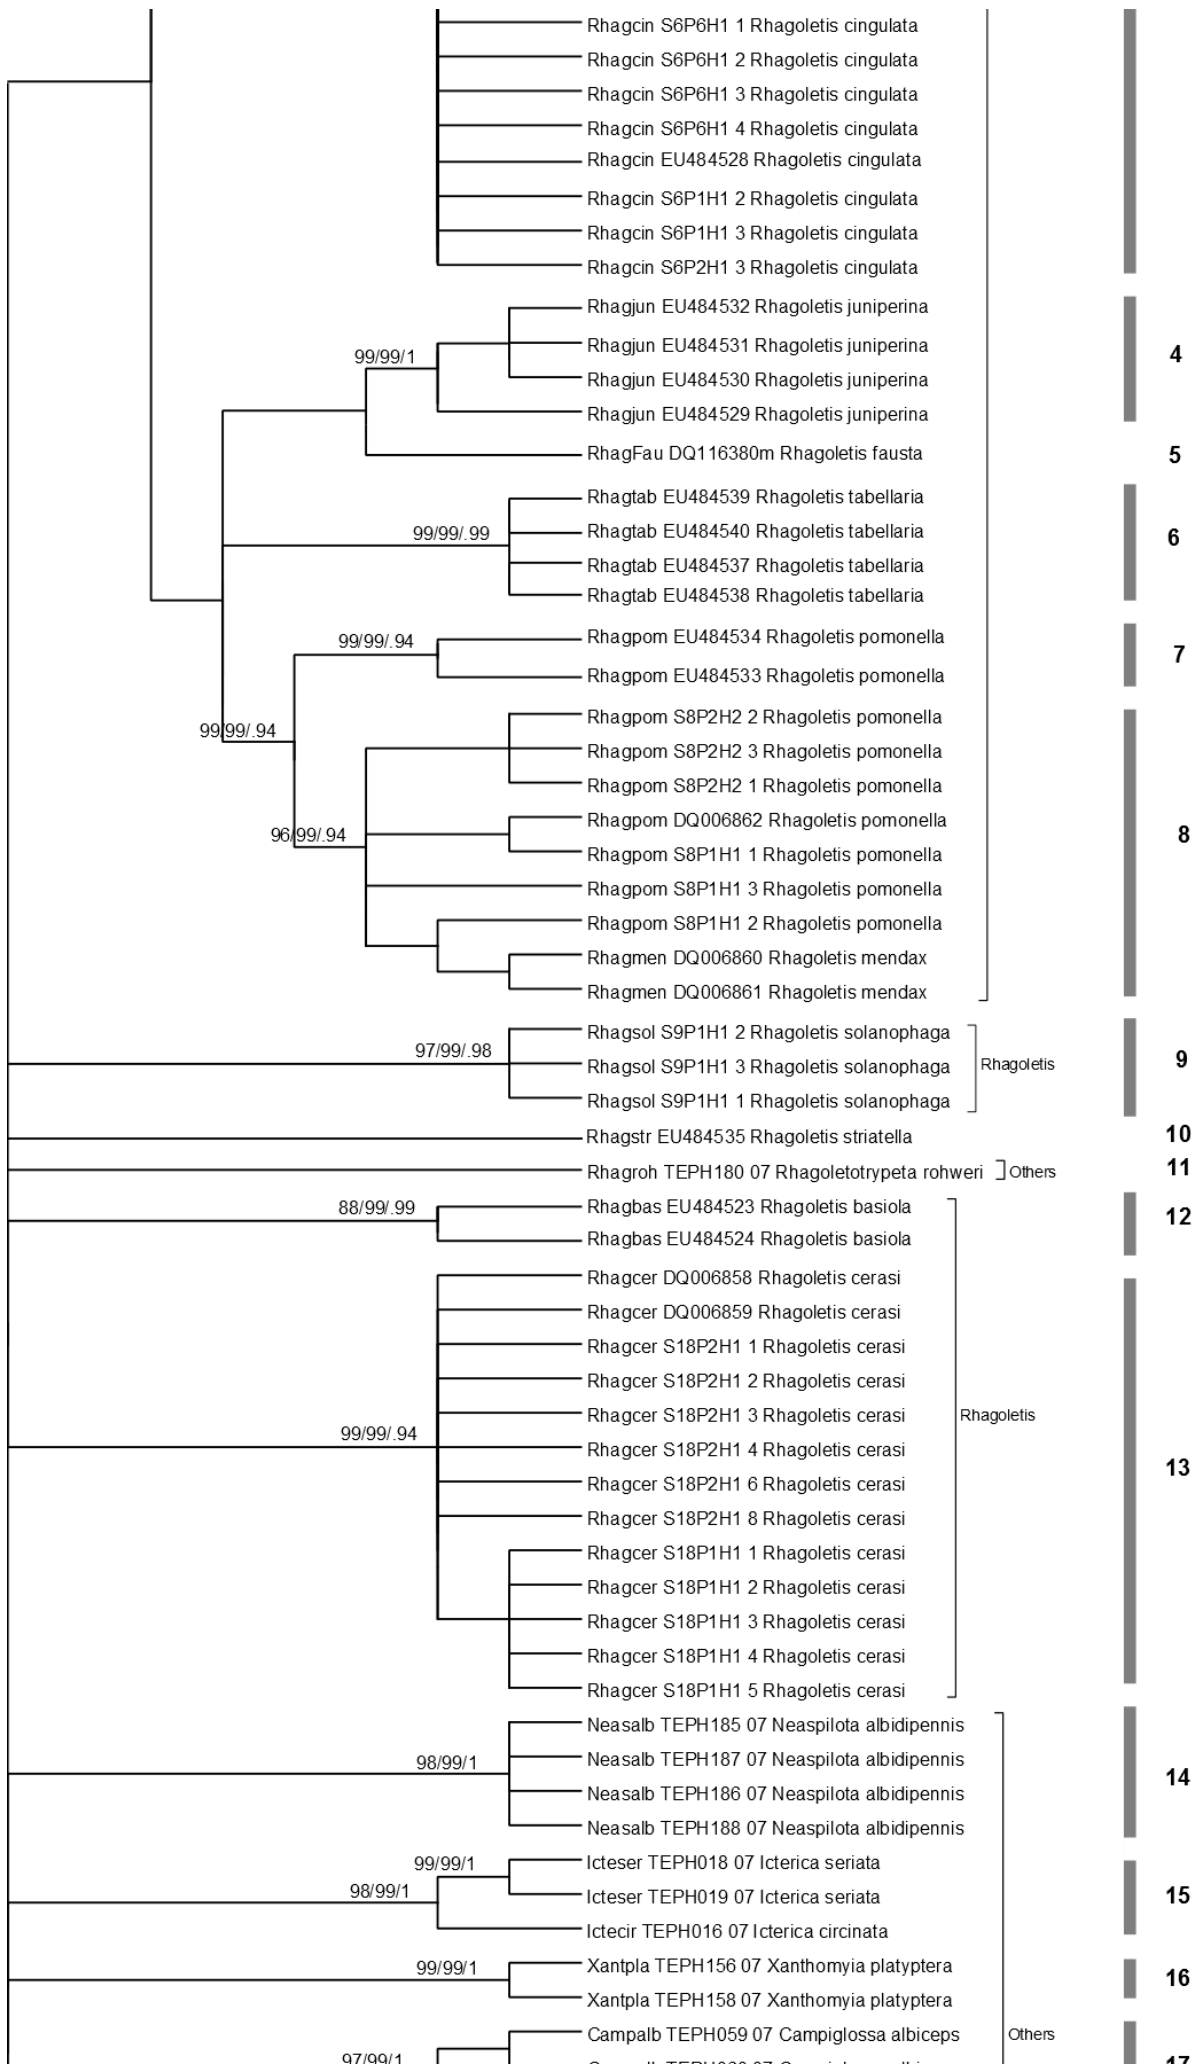

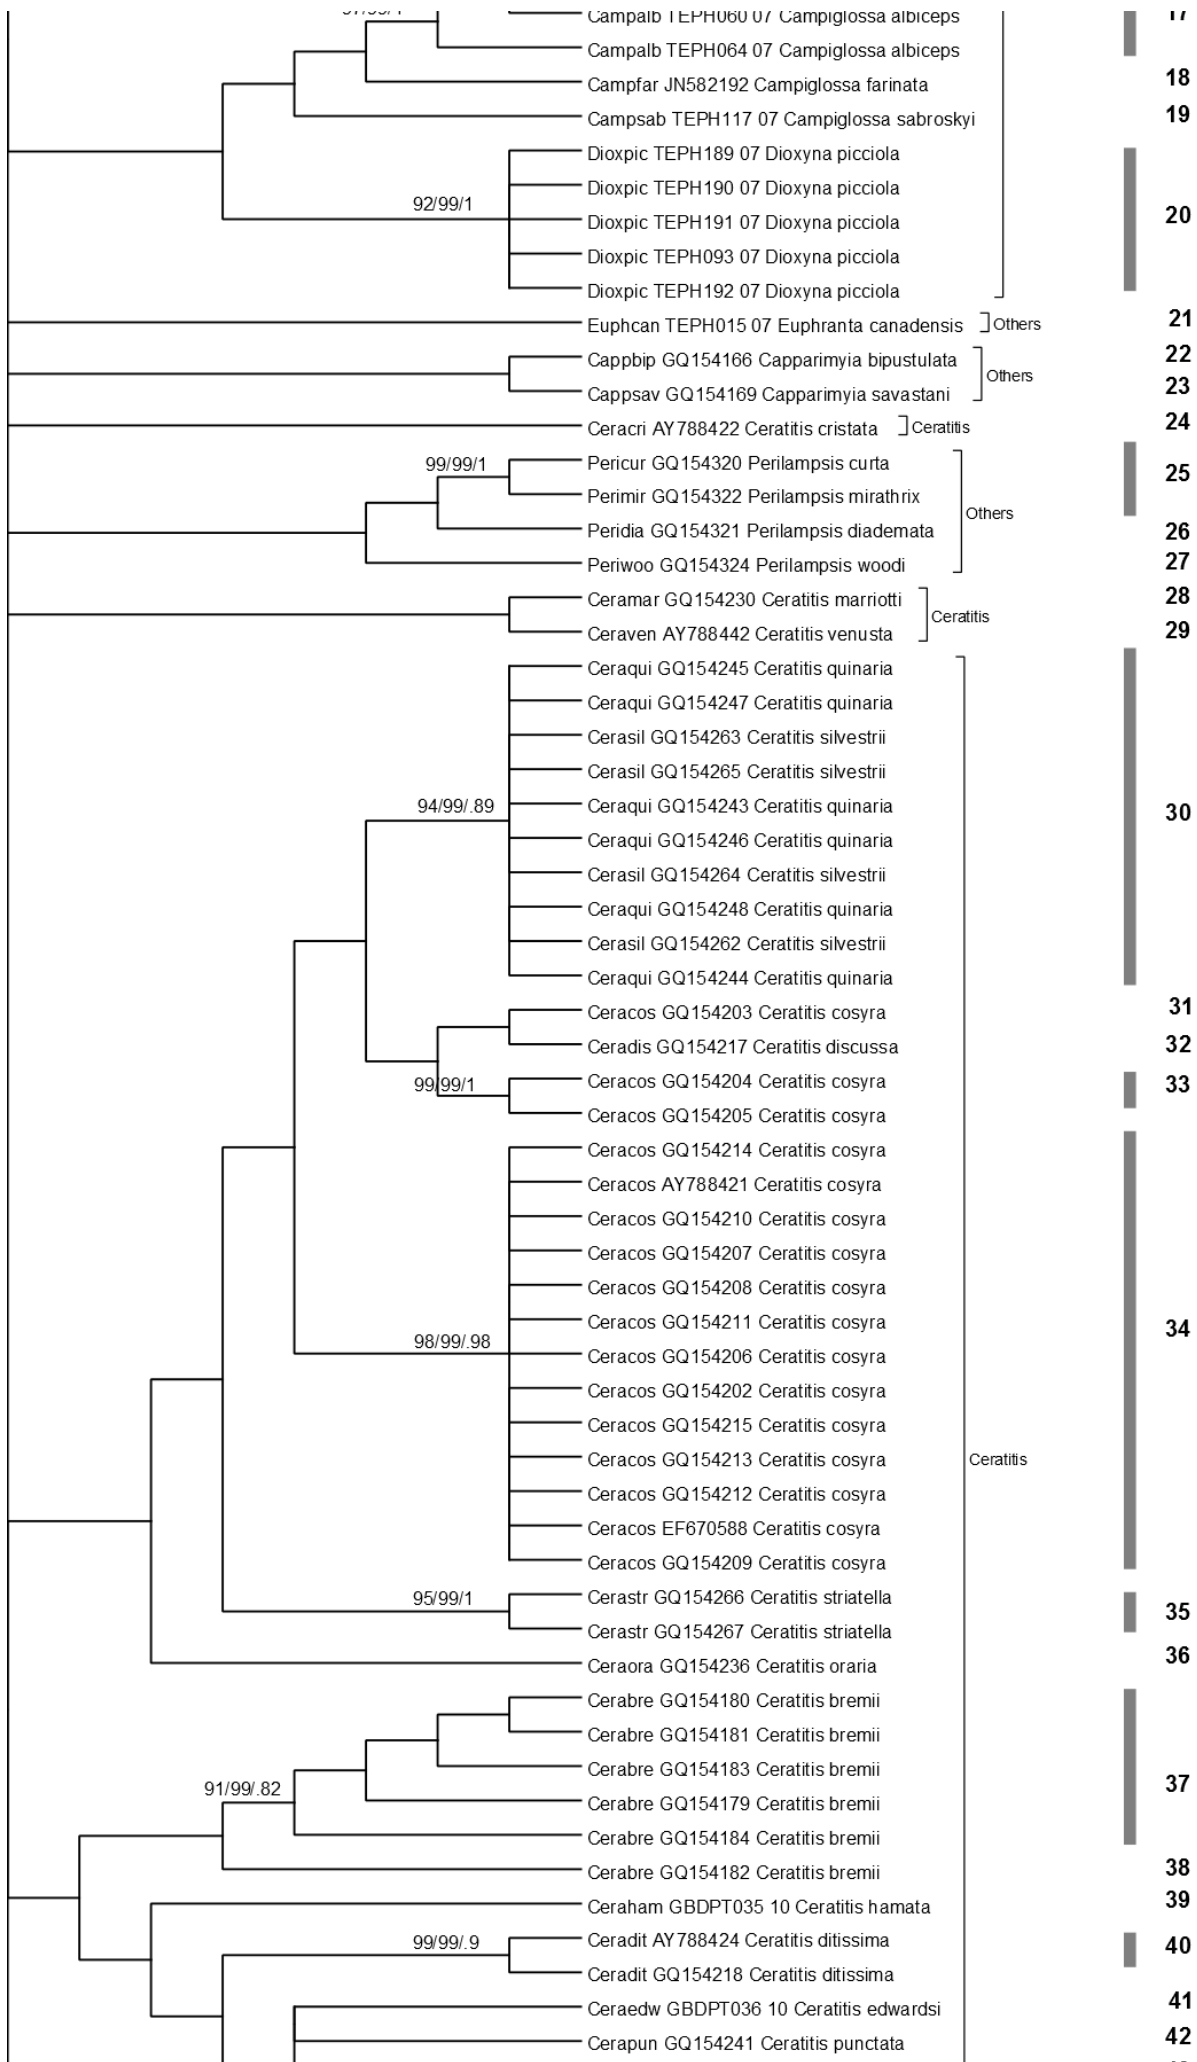

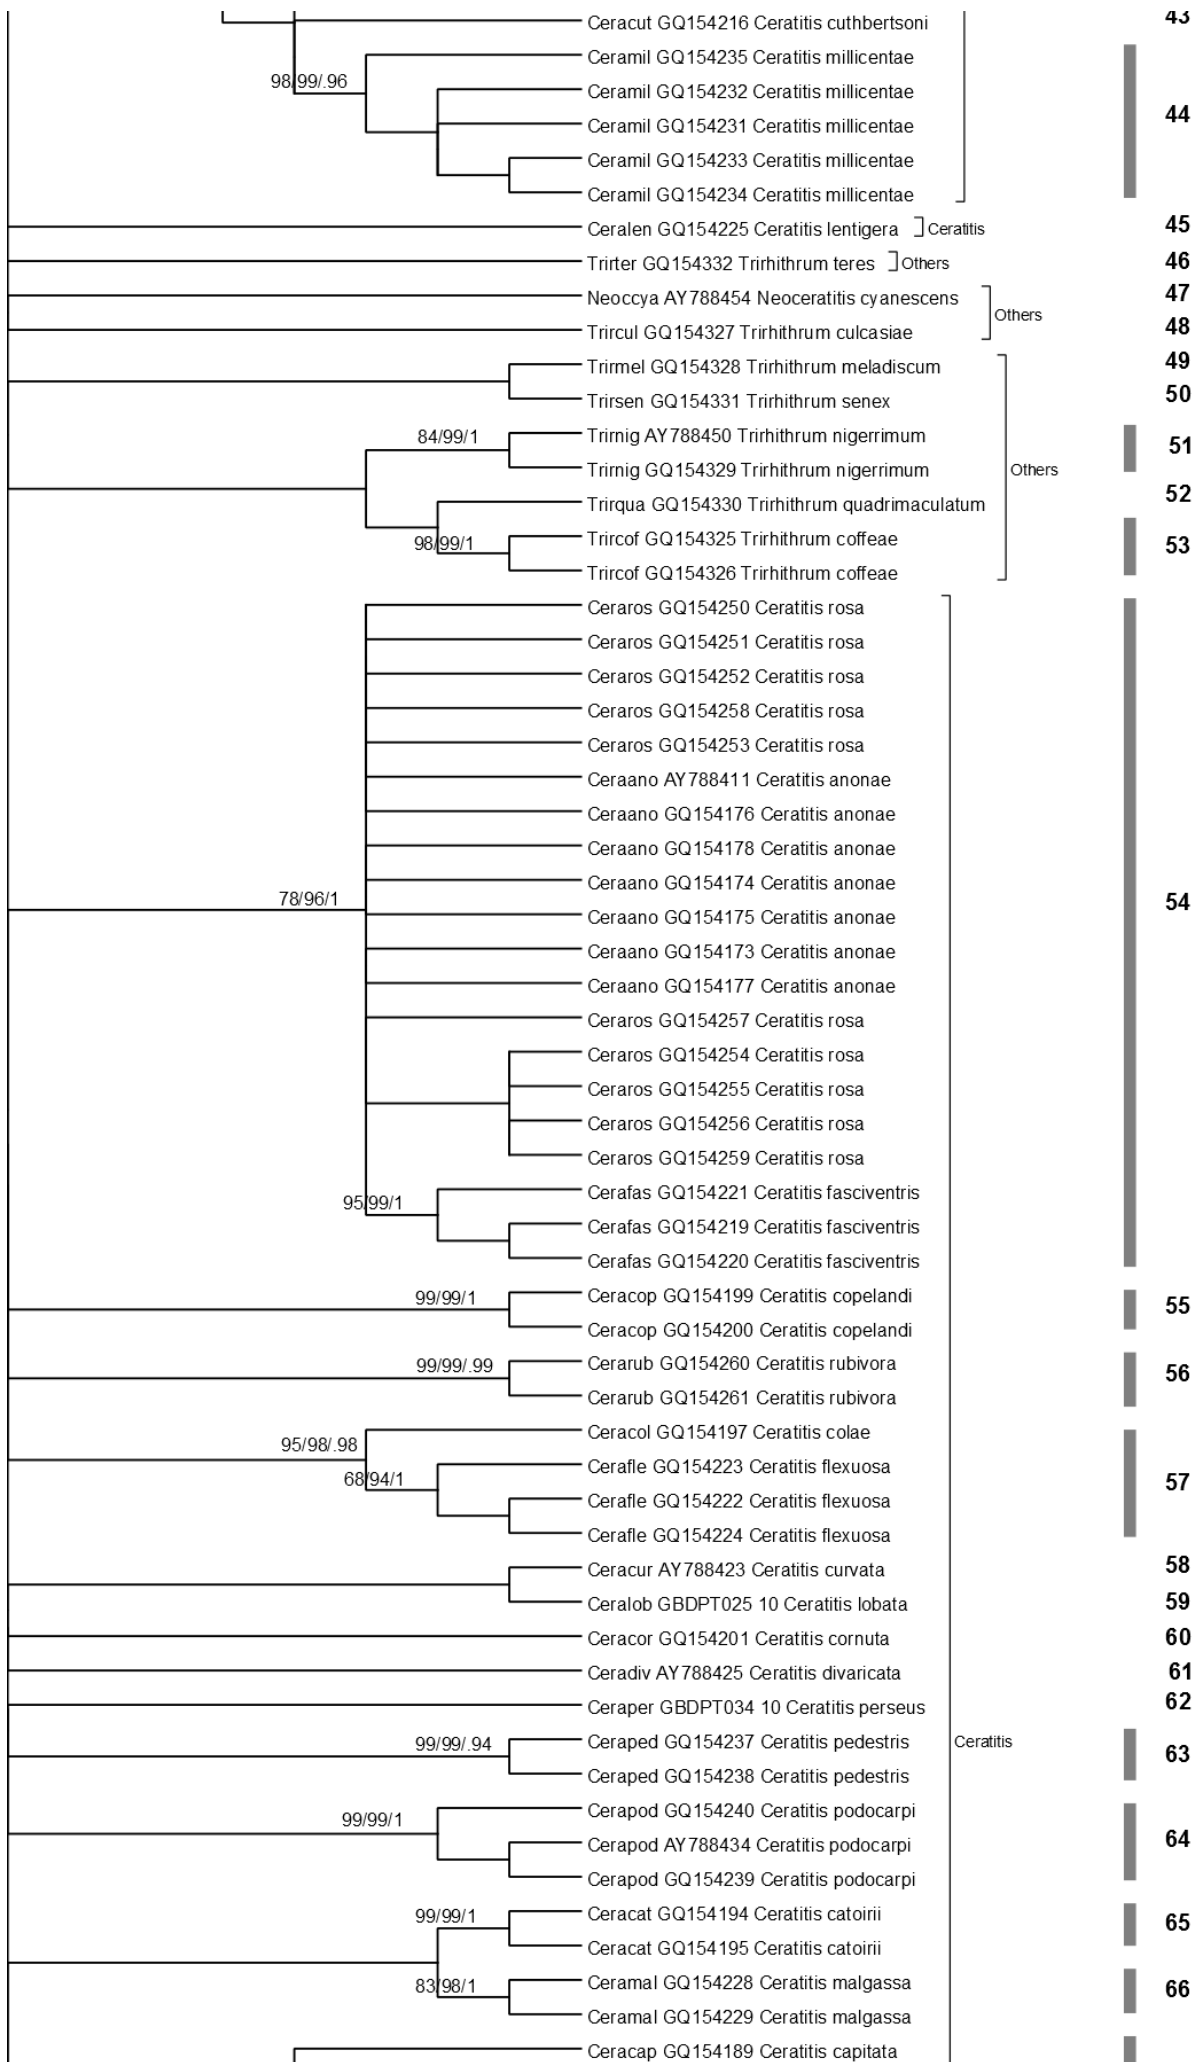

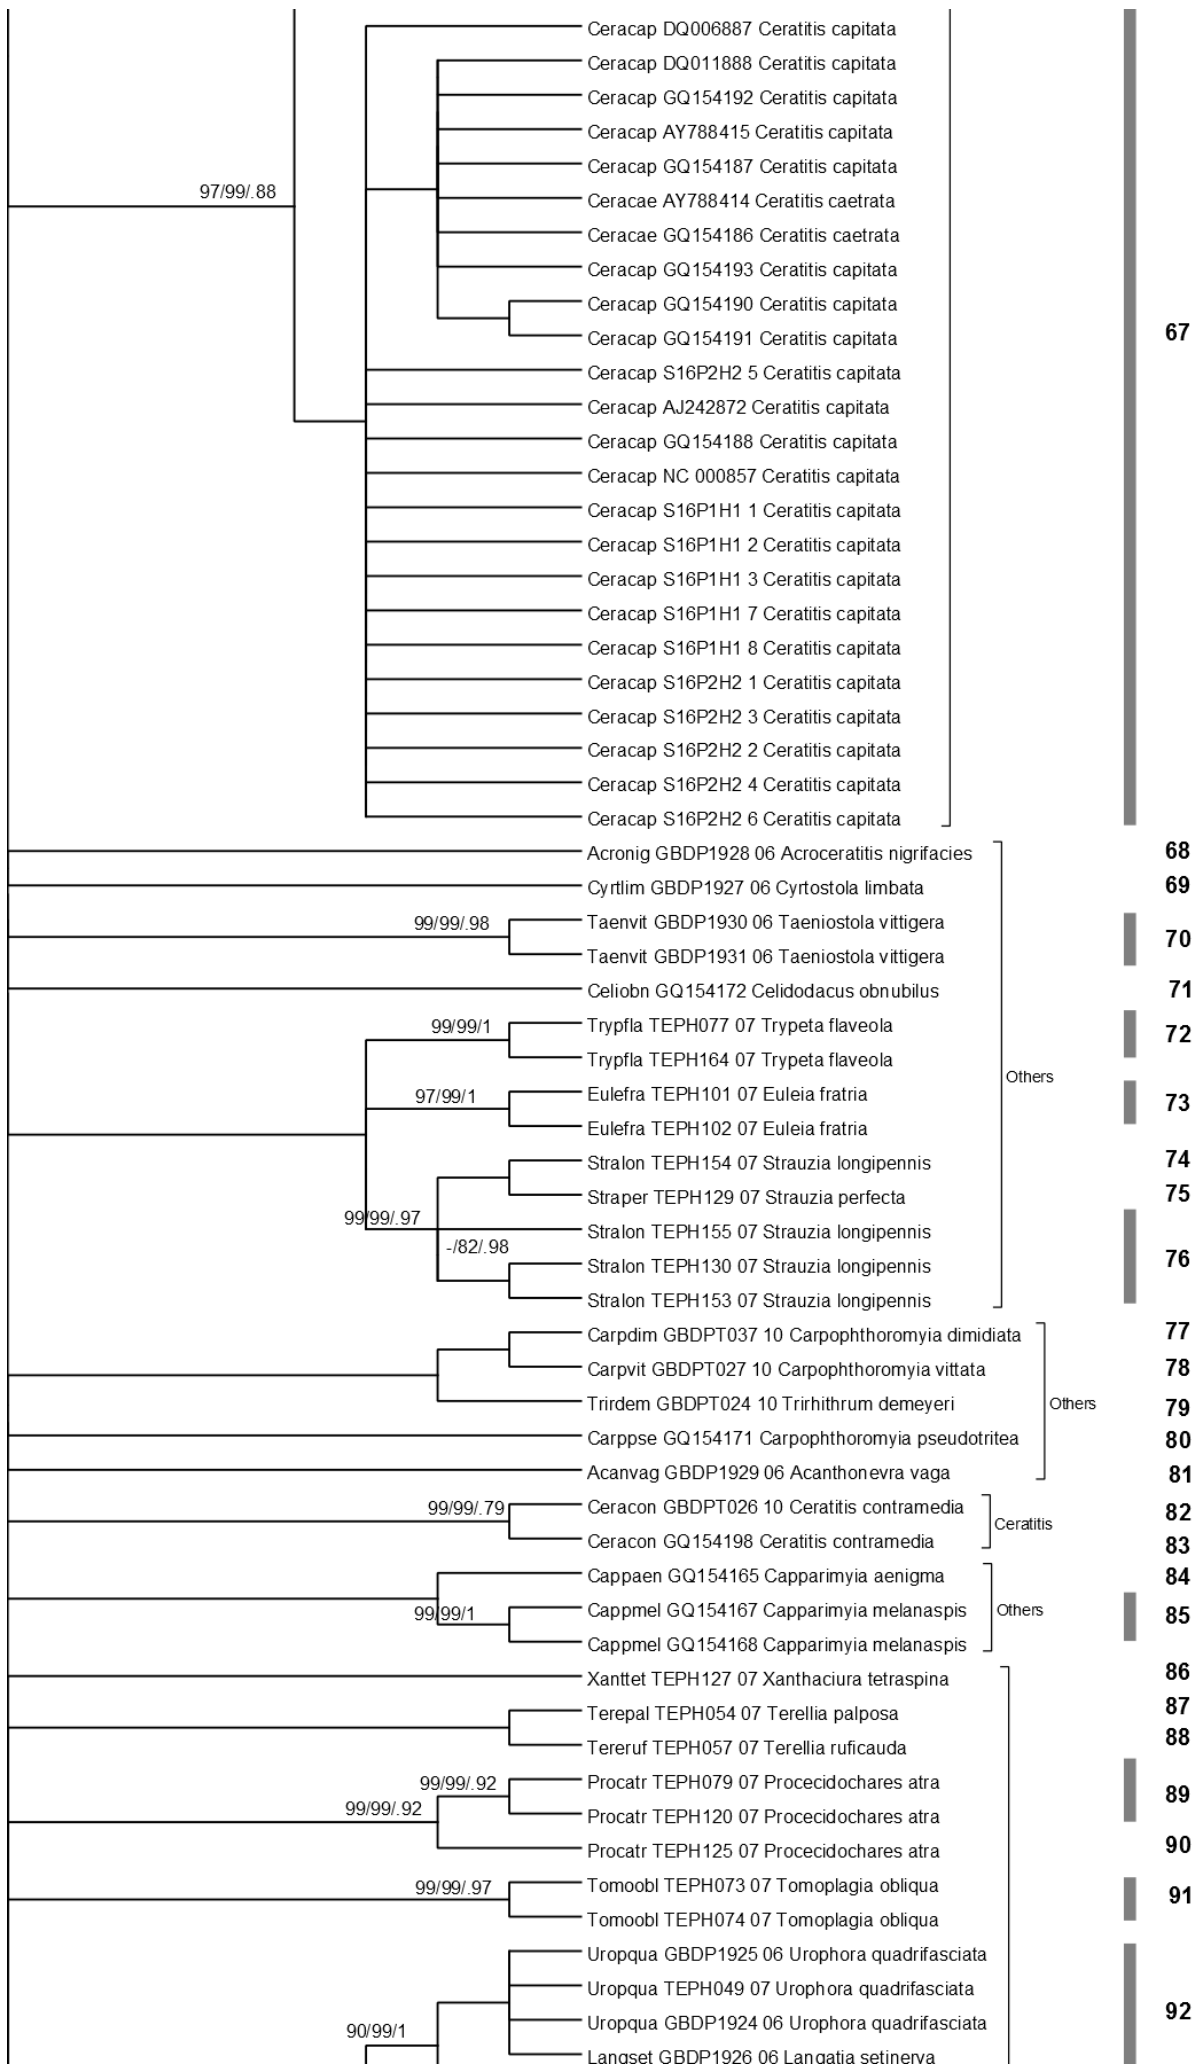

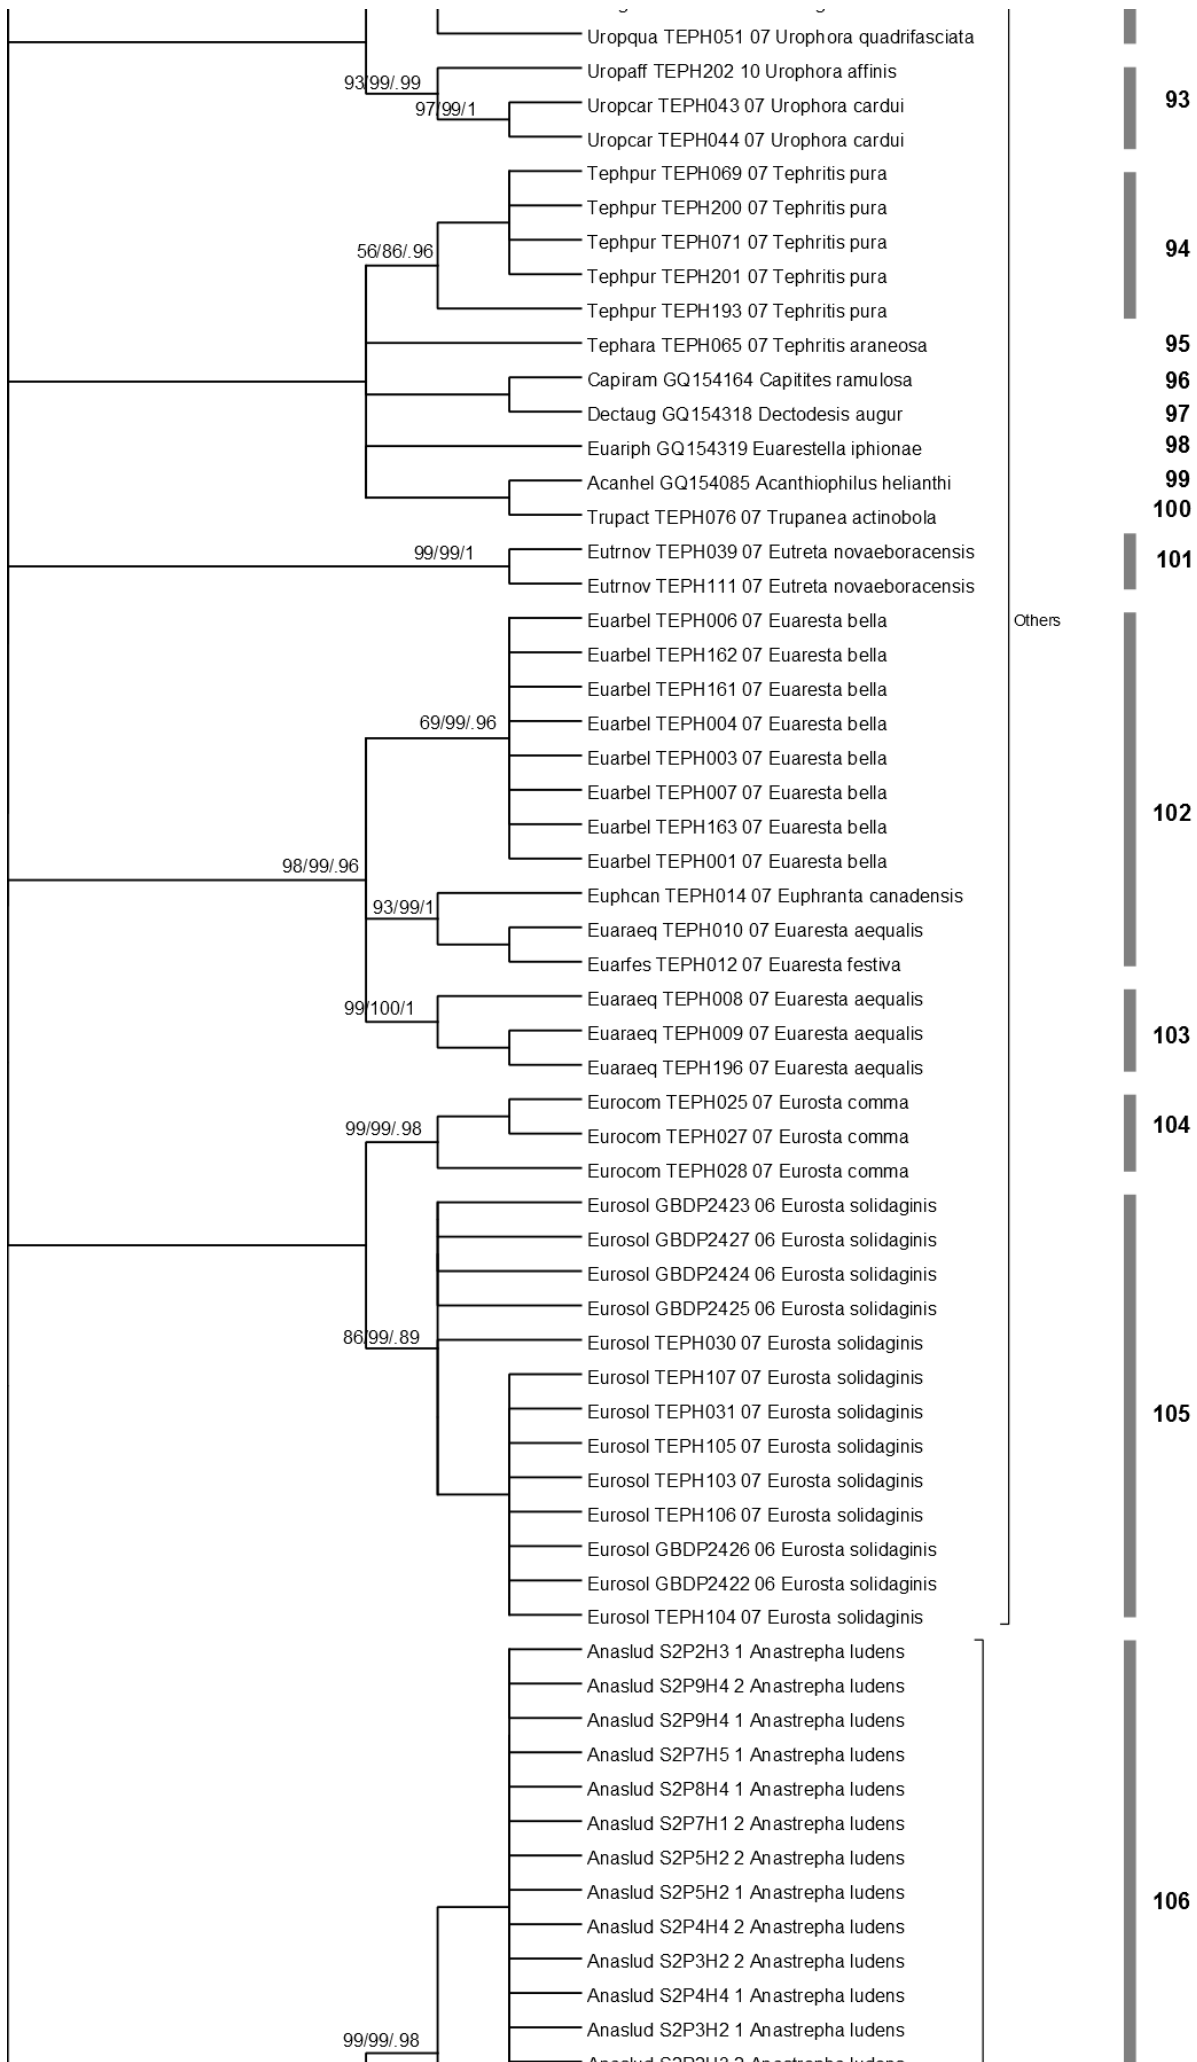

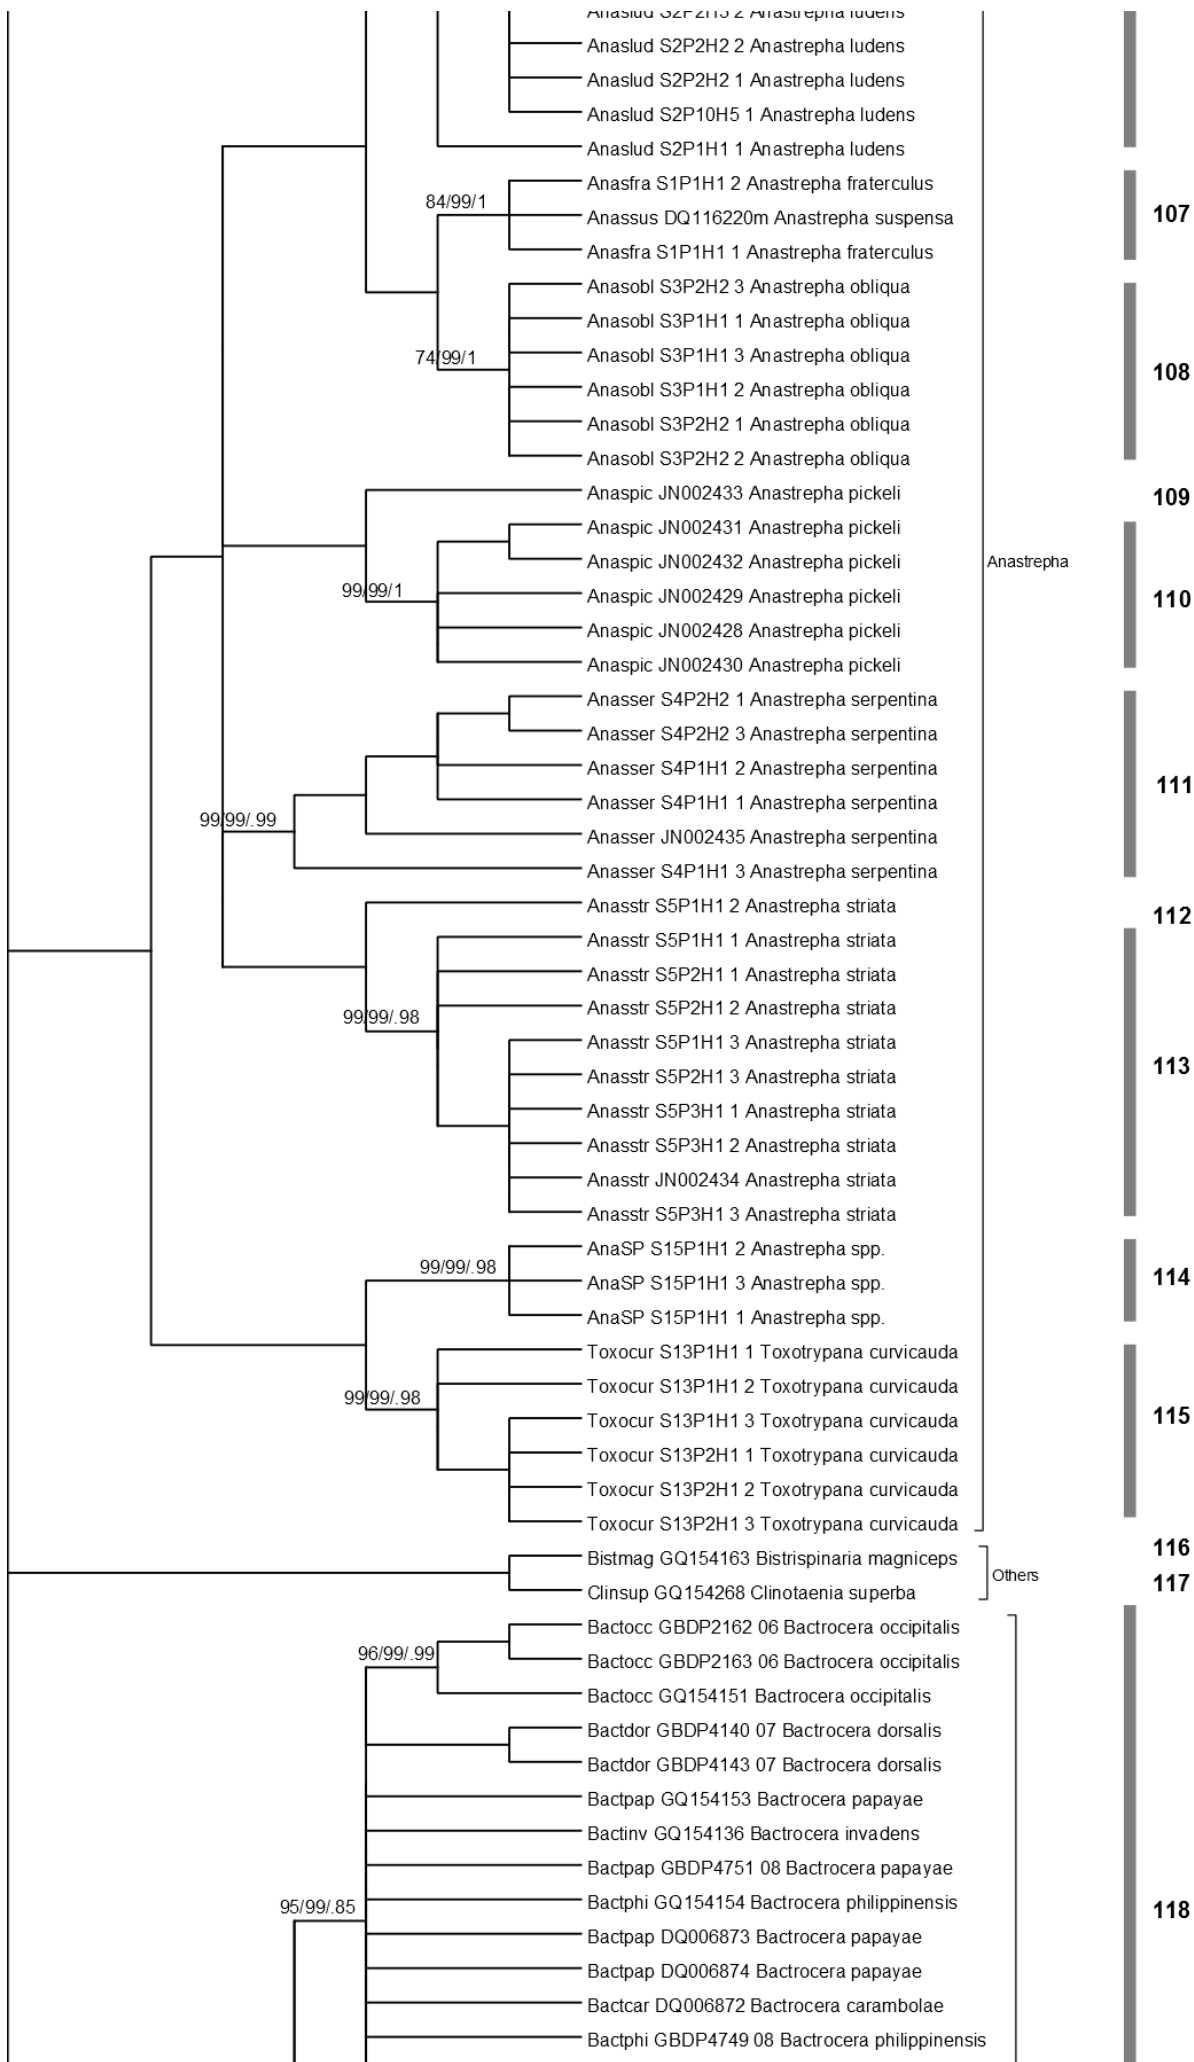

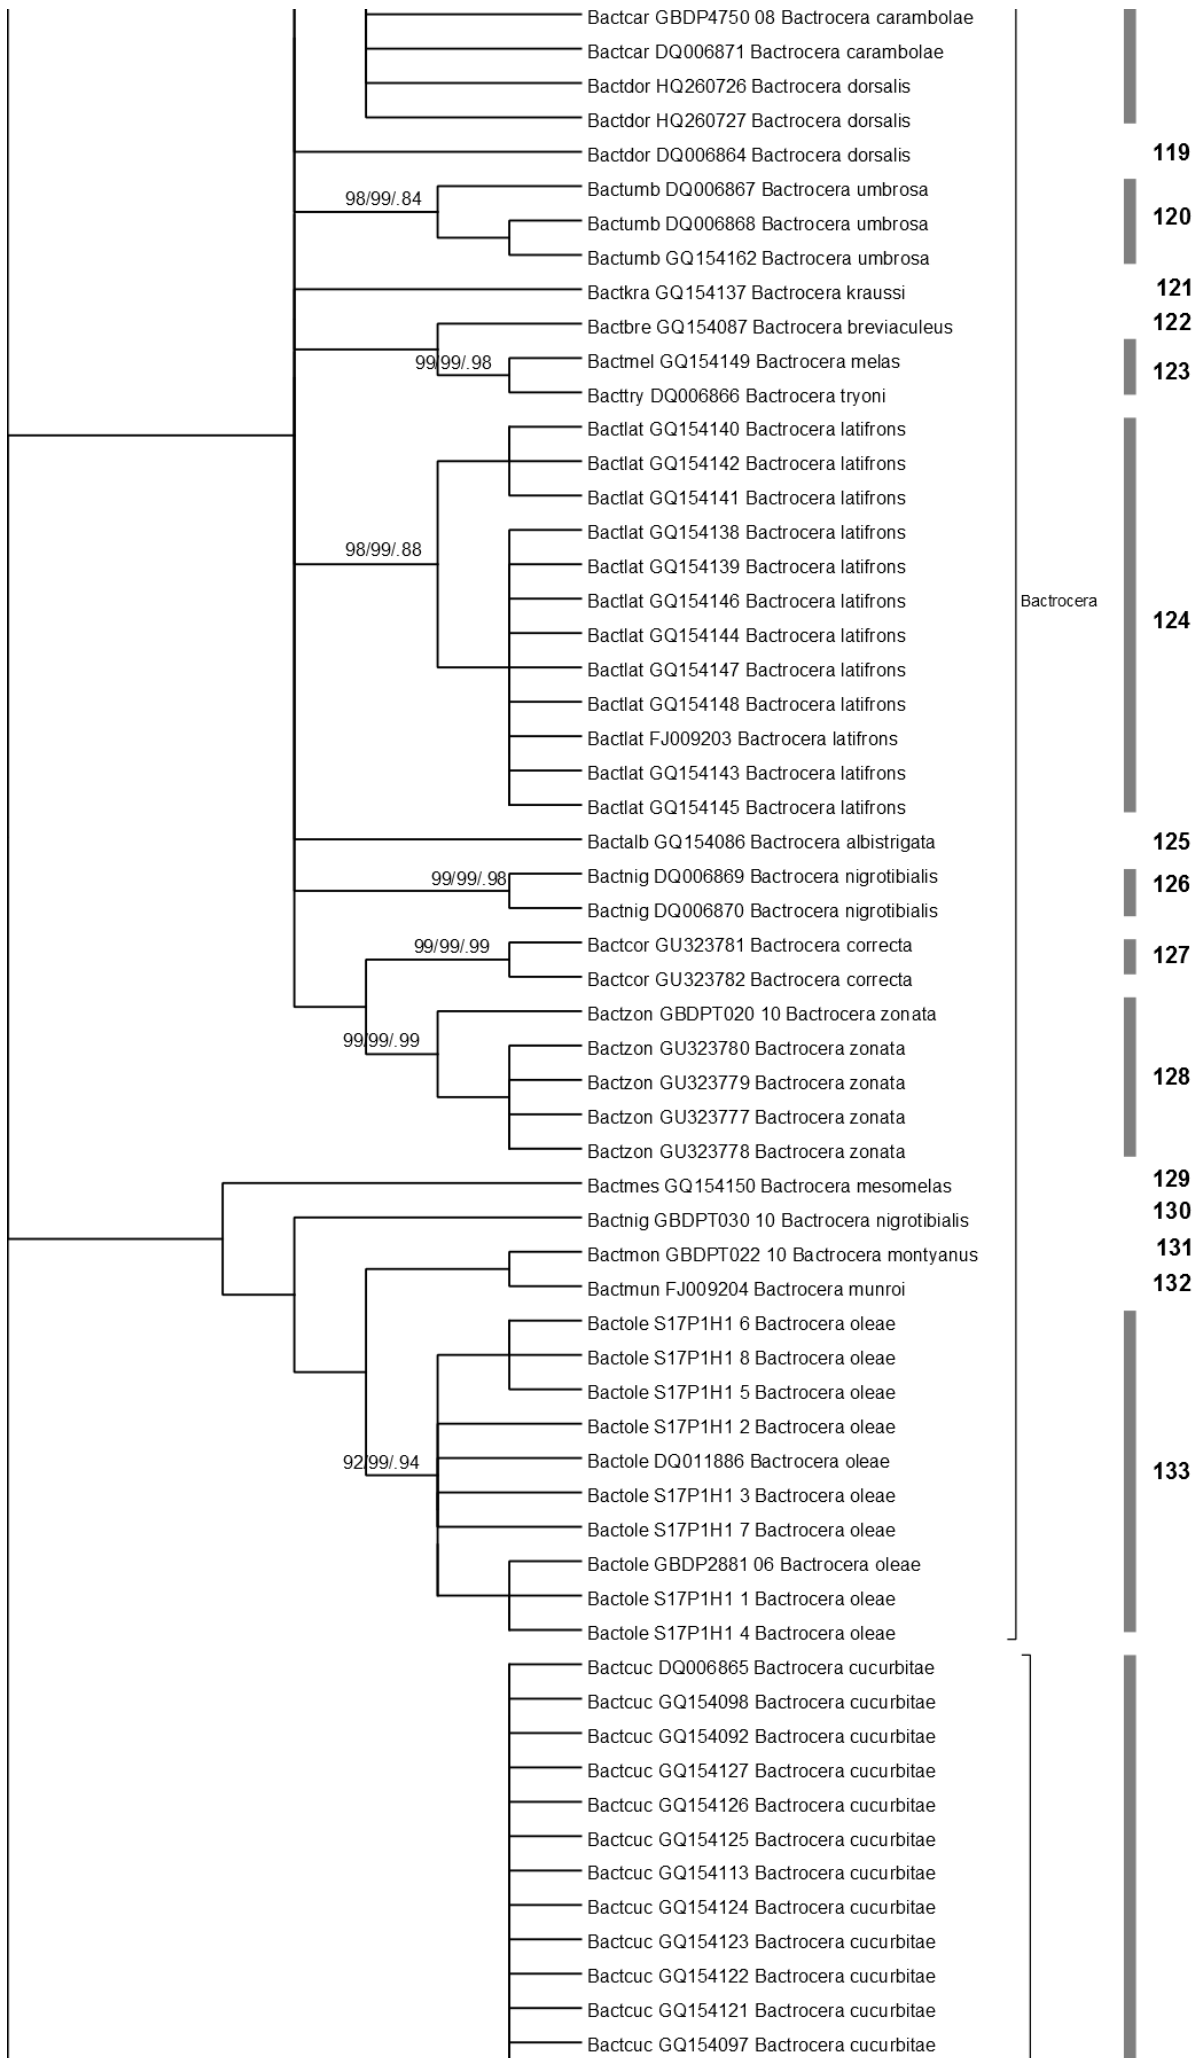



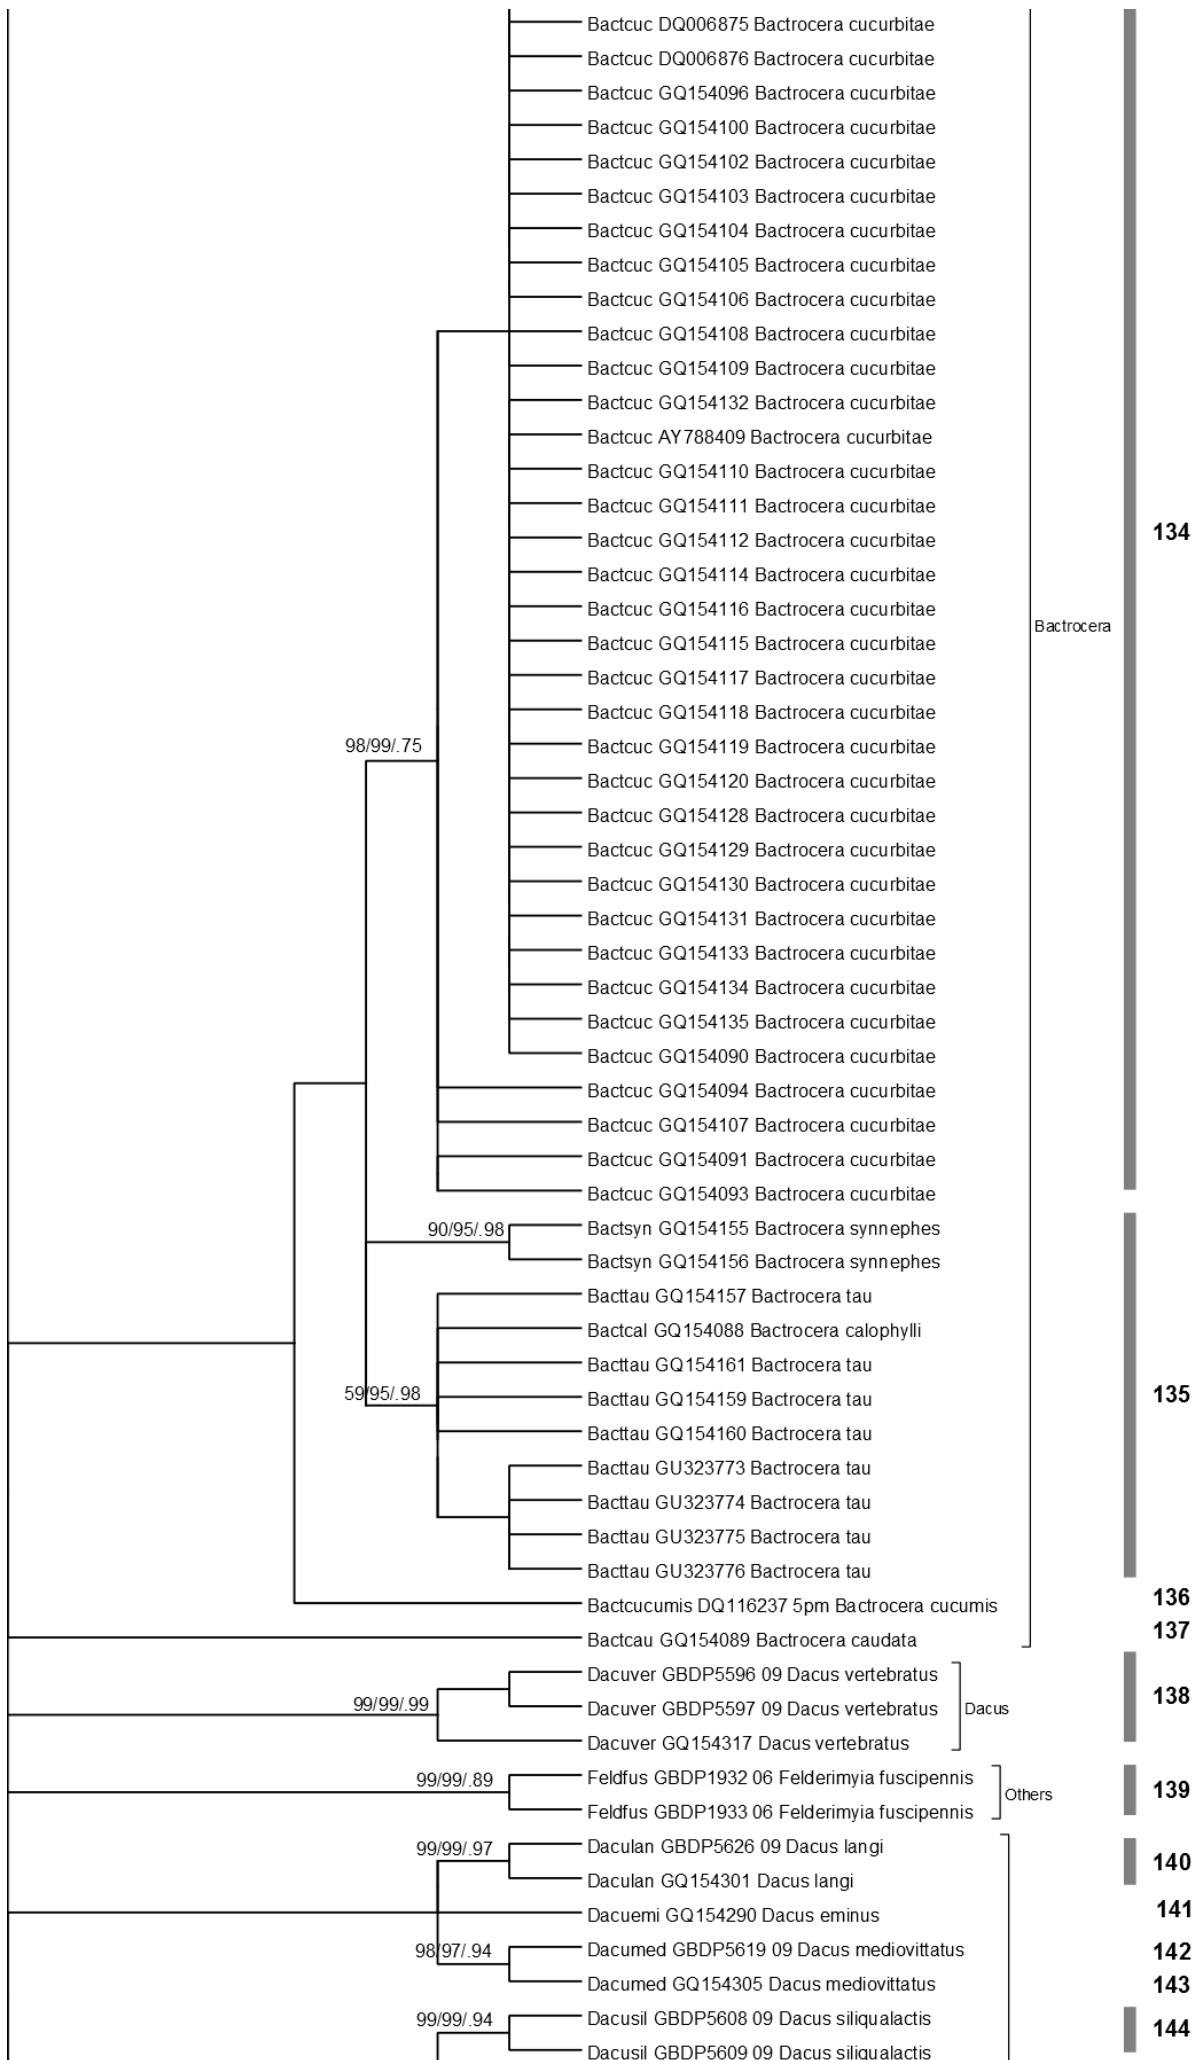

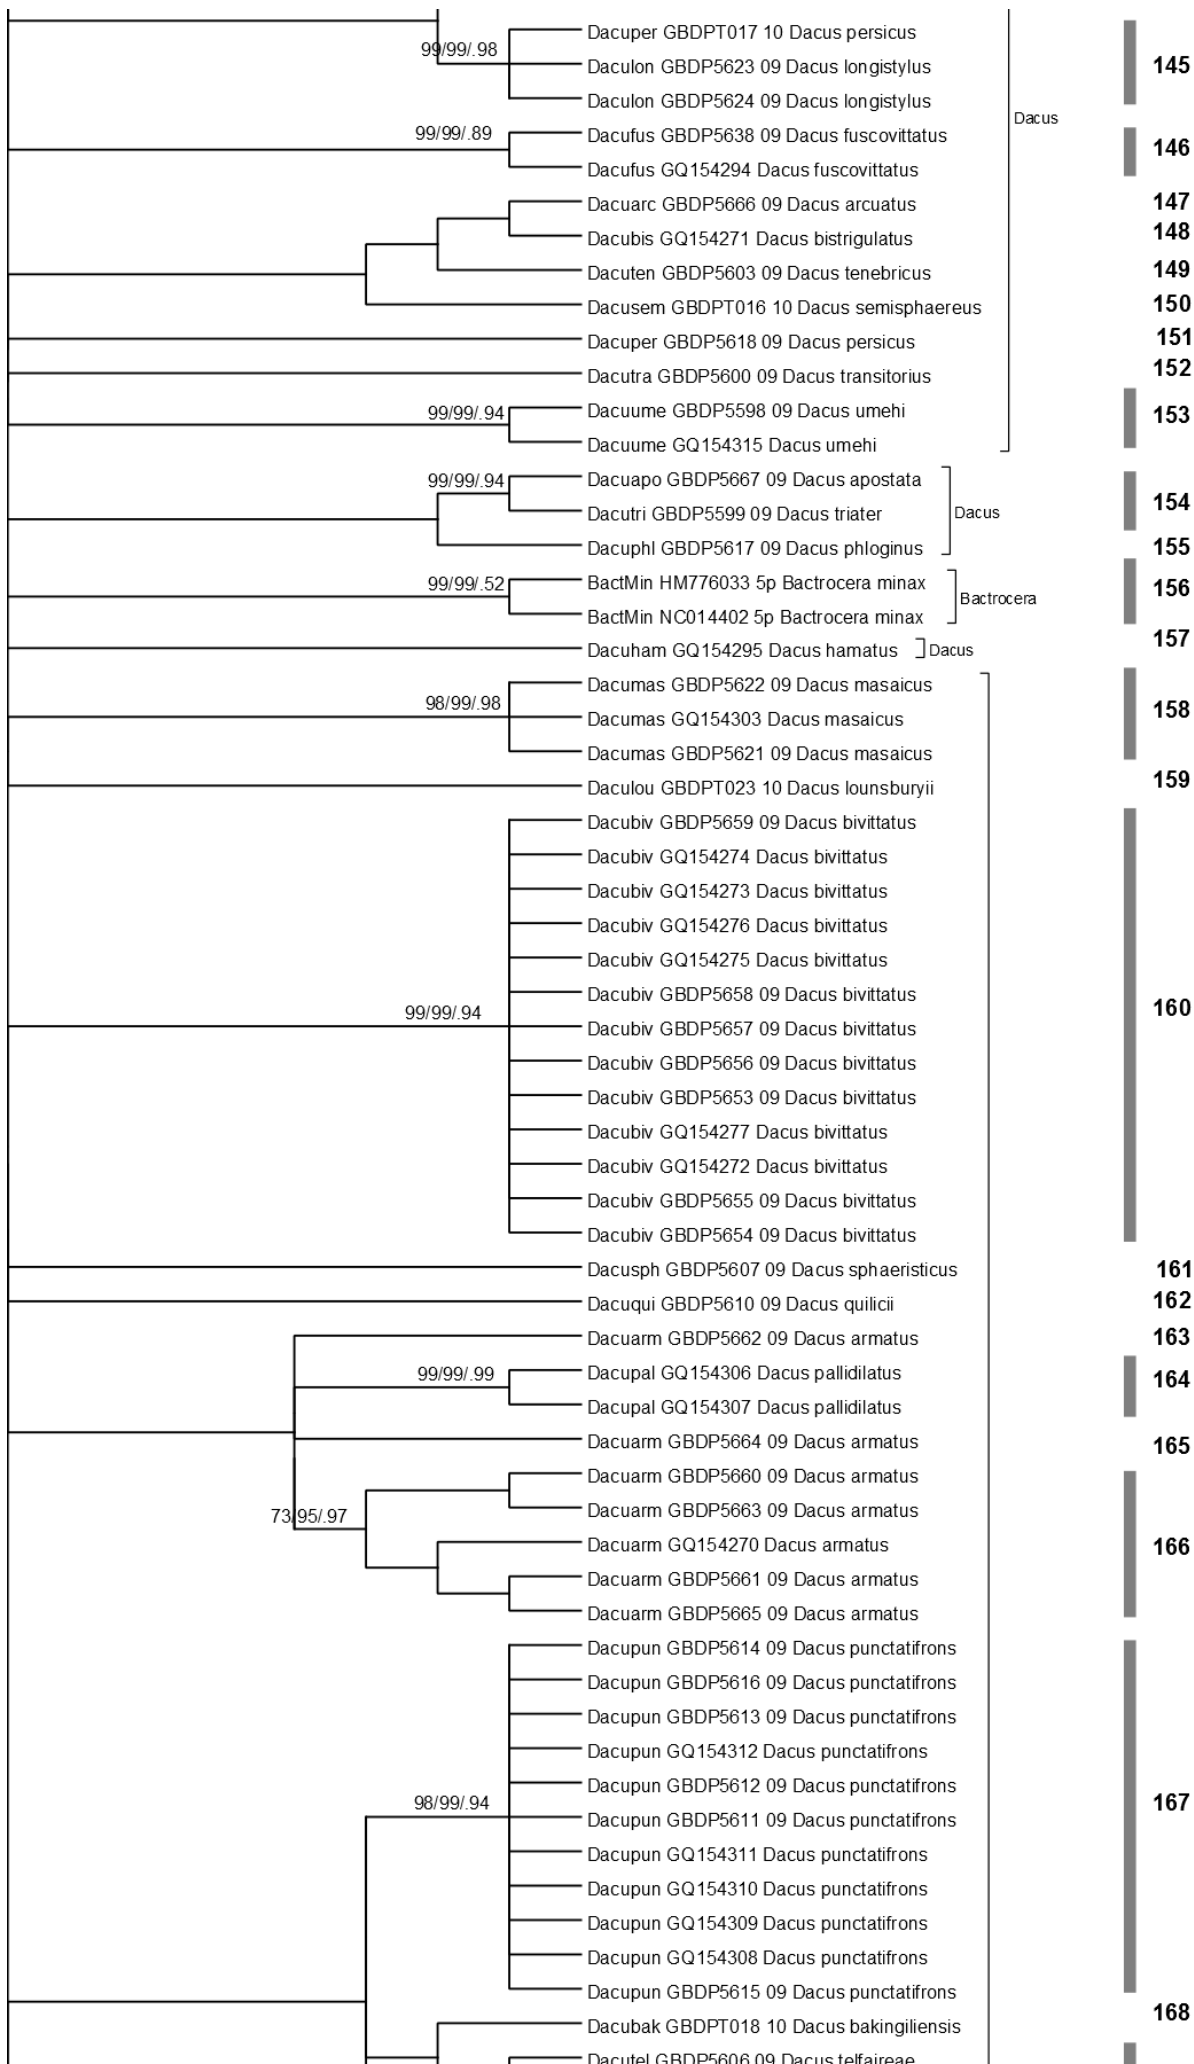

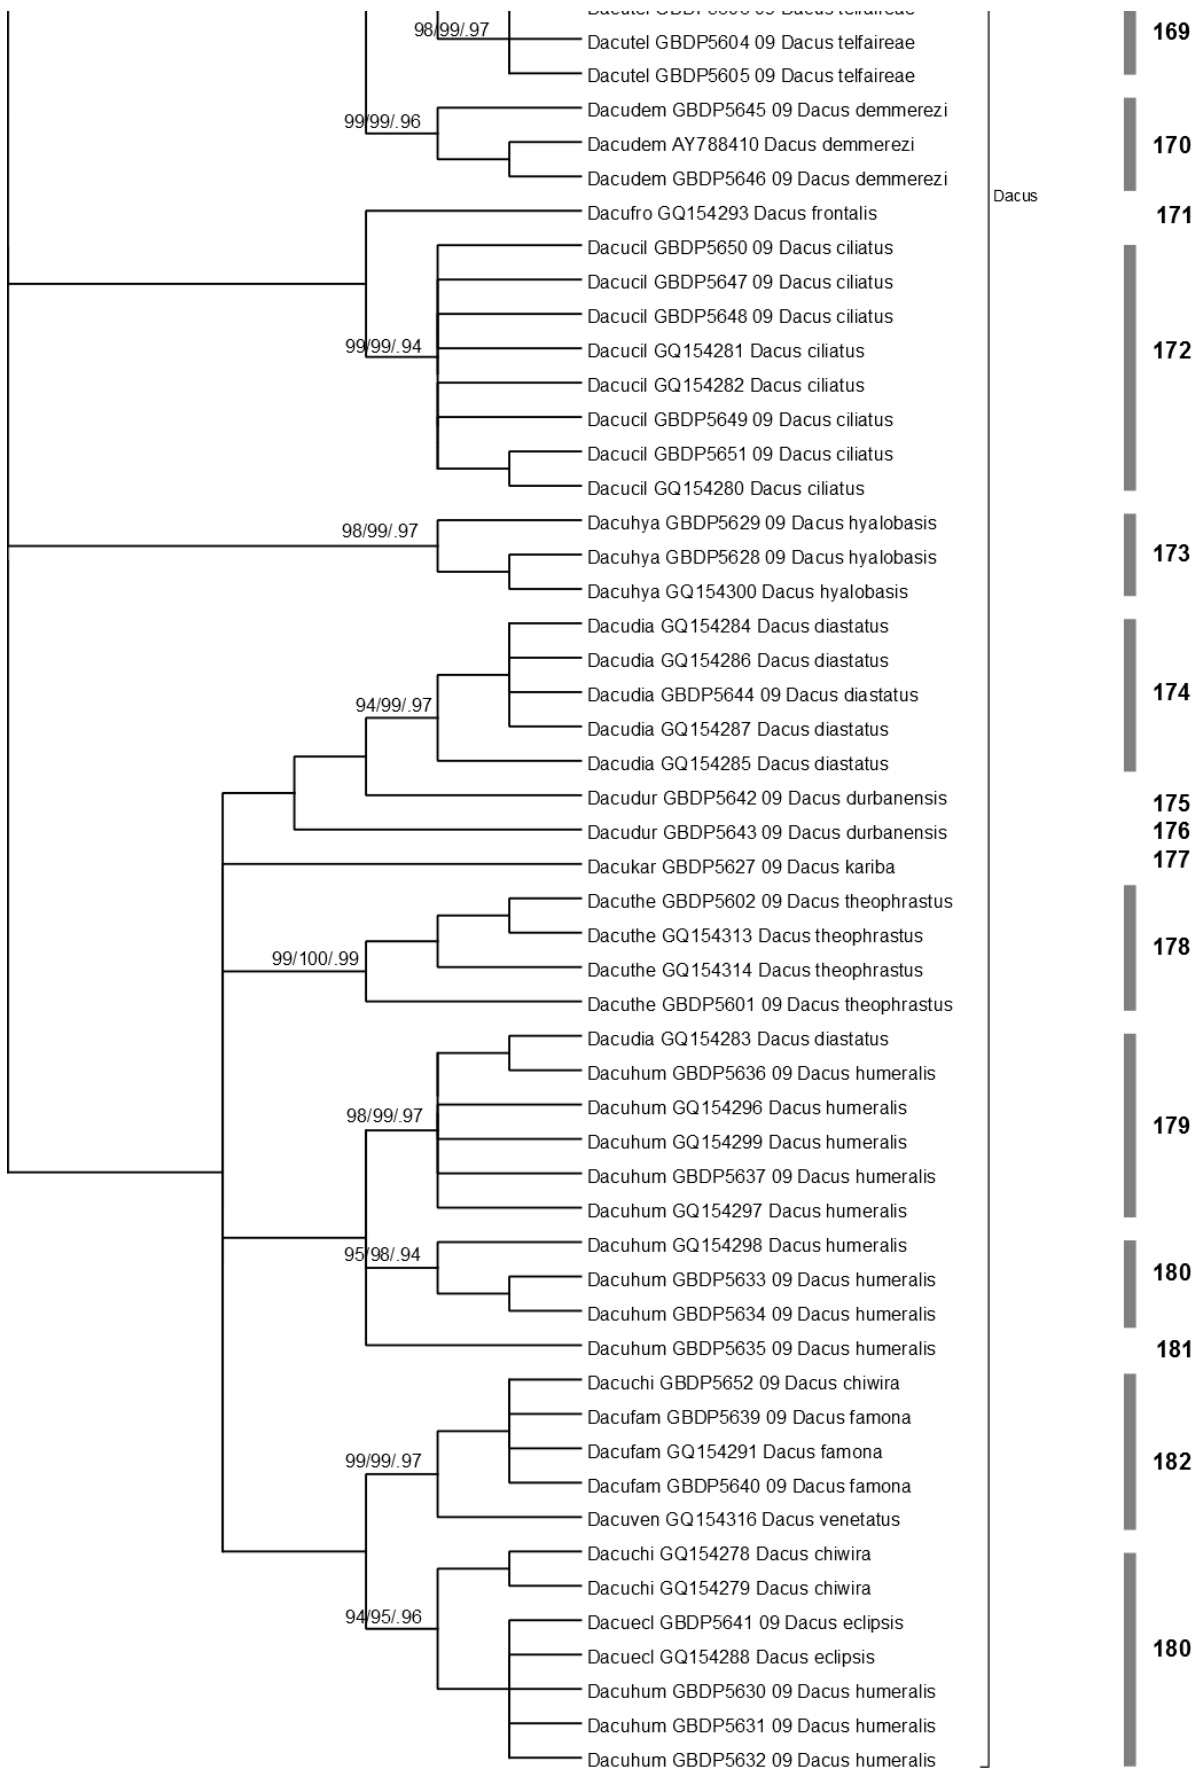

Supplement: 1471-2148-13-106-S2.pdf [file 1471-2148-13-106-S2.pdf]
